# Supplementary material for: Reconfigurable self-powered imaging photodetectors by reassembling and disassembling ZnO/perovskite heterojunctions
Source: Royal Society of Chemistry journal article supplement (doi:10.1039/d2tc01419j), 2022-01-01
Supplement: d2tc01419j1.pdf [file d2tc01419j1.pdf]

## Supporting information

### **Reconfigurable self-powered imaging photodetectors by reassembling and disassembling ZnO/perovskite heterojunction**

Jun Yan<sup>a</sup>, Yao Li<sup>a</sup>, Feng Gao<sup>a</sup>, Weiqiang Gong<sup>a</sup>, Yongzhi Tian<sup>b</sup> and Lin Li<sup>a,\*</sup>

<sup>a</sup> Key Laboratory for Photonic and Electronic Bandgap Materials, Ministry of Education, School of Physics and Electronic Engineering, Harbin Normal University  
Harbin 150025, China.

E-mail: [physics\\_lin@hotmail.com](mailto:physics_lin@hotmail.com); [lil@hrbnu.edu.cn](mailto:lil@hrbnu.edu.cn)

<sup>b</sup> School of Physics and Engineering, Zhengzhou University, Zhengzhou, 450001, China.

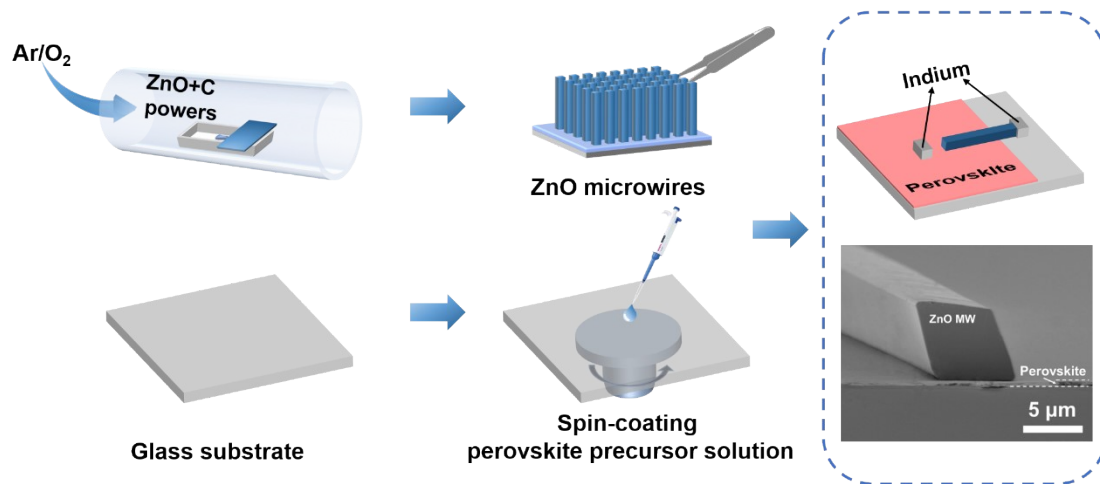

**Fig. S1** Schematic illustration of the ZnO MW/Perovskite heterojunction fabrication process.

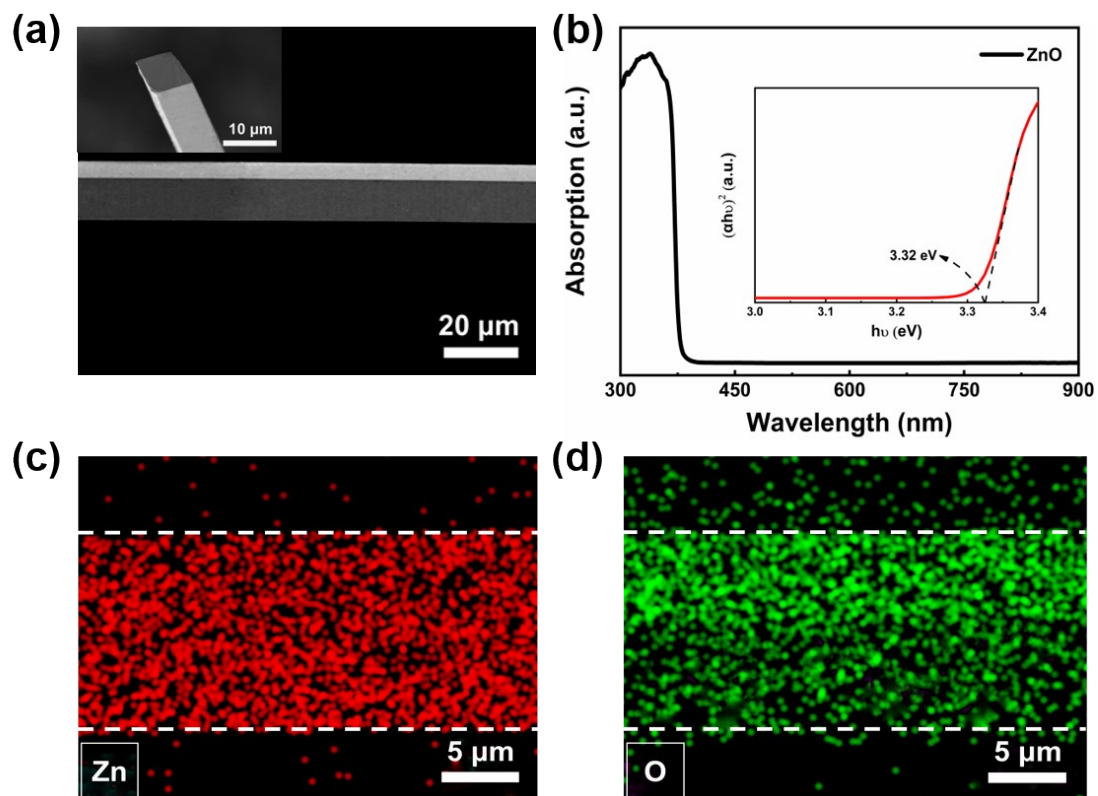

**Fig. S2** (a) The SEM images of the ZnO MW, with the cross-section shown in the inset. (b) The optical absorption spectrum of the ZnO MW. The corresponding elemental mapping distributions of (c) Zn and (d) O in ZnO MW.

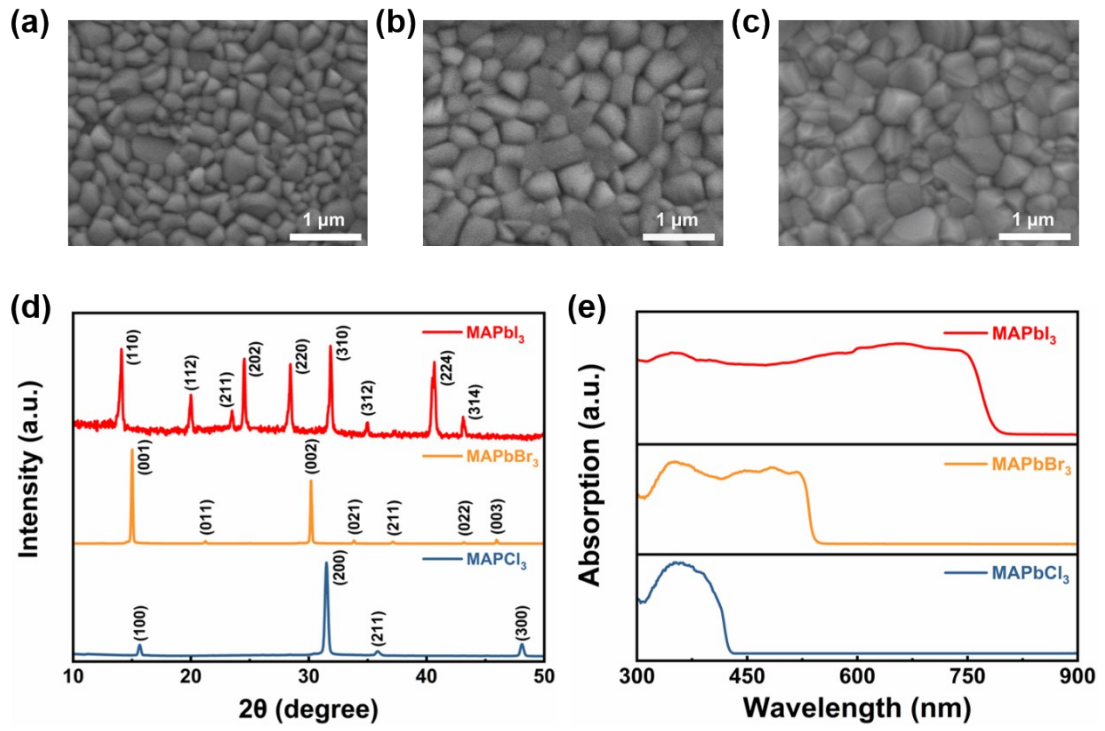

**Fig. S3** (a-c) The SEM images of MAPbCl<sub>3</sub>, MAPbBr<sub>3</sub> and MAPbI<sub>3</sub> film. (d) The XRD and (e) The absorption spectra of MAPbI<sub>3</sub>, MAPbBr<sub>3</sub> and MAPbCl<sub>3</sub> film, respectively.

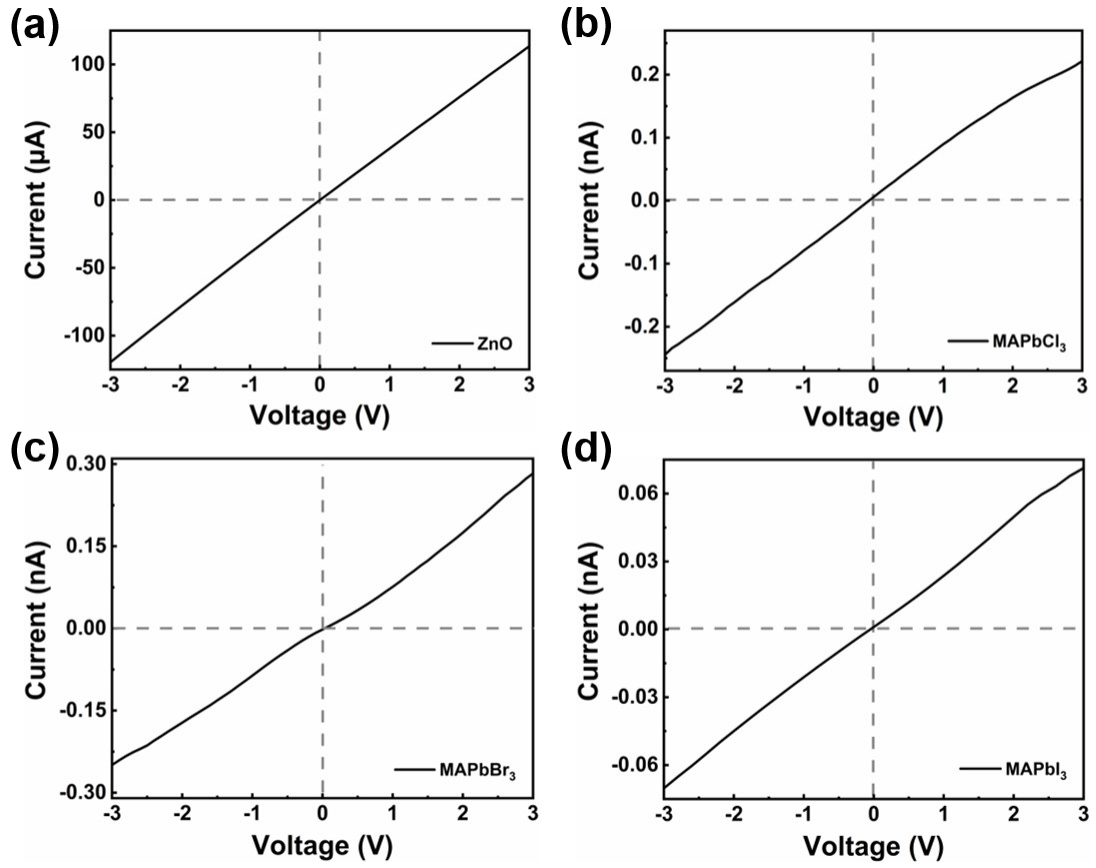

**Fig. S4** The *I-V* curves of (a) Indium-ZnO MW-Indium, (b) Indium-MAPbCl<sub>3</sub>-Indium, (c) Indium-MAPbBr<sub>3</sub>-Indium and (d) Indium-MAPbI<sub>3</sub>-Indium under dark.

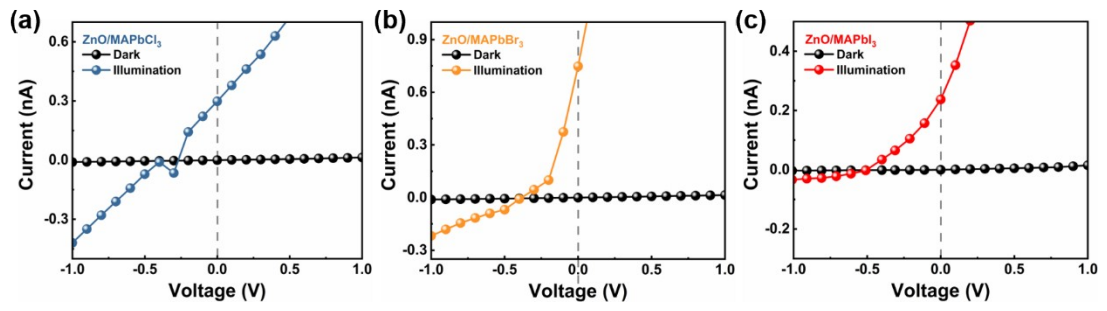

**Fig. S5** The linear *I-V* curves of (a) ZnO MW/MAPbCl<sub>3</sub>, (b) ZnO MW/MAPbBr<sub>3</sub> and (c) ZnO MW/MAPbI<sub>3</sub> in dark and under illumination (AM 1.5G, 100 mW cm<sup>-2</sup>) near the 0 V.

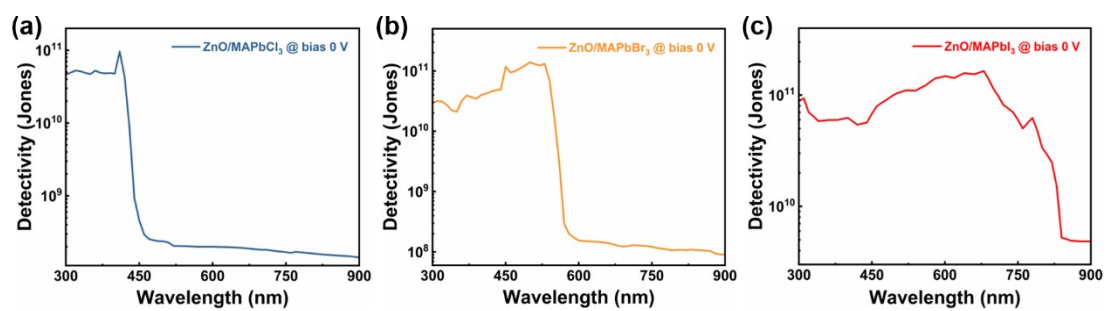

**Fig. S6** (a-c) The detectivity spectrum of the ZnO MW/MAPbCl<sub>3</sub>, ZnO MW/MAPbBr<sub>3</sub> and ZnO MW/MAPbI<sub>3</sub> heterojunction photodetector at 0 V.

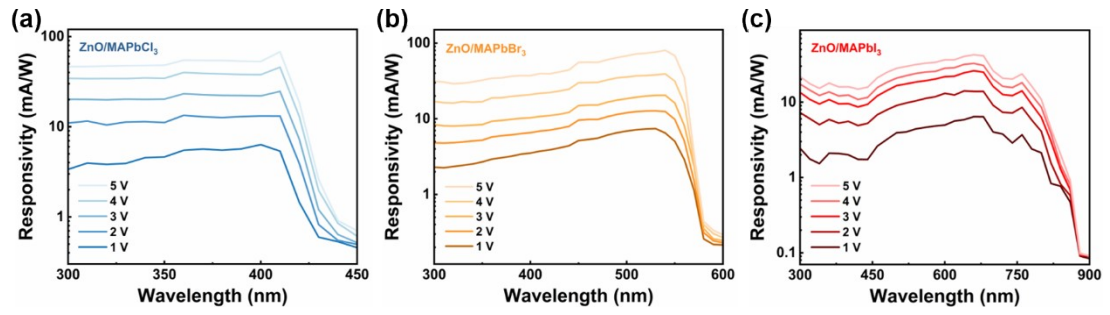

**Fig. S7** (a-c) The photoresponse spectra of the ZnO MW/MAPbCl<sub>3</sub>, ZnO MW/MAPbBr<sub>3</sub> and ZnO MW/MAPbI<sub>3</sub> heterojunction photodetector at different bias voltage.



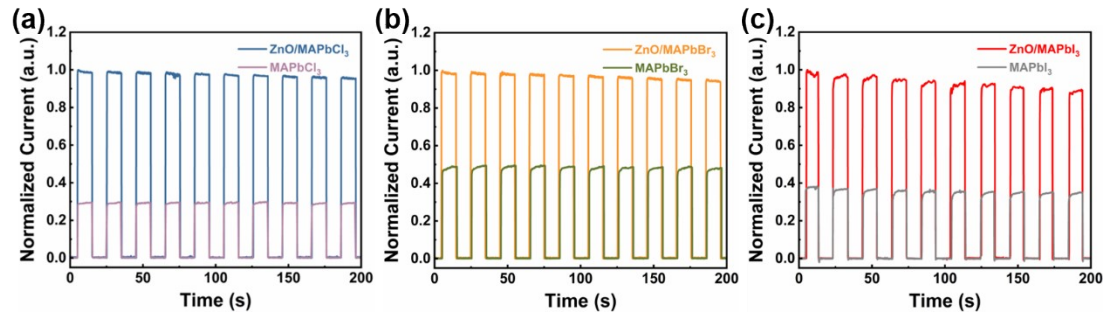

**Fig. S8** (a-c) Time-dependent response of heterojunction and perovskite film photodetectors at 5 V under illumination (AM 1.5G, 100 mW cm<sup>-2</sup>).

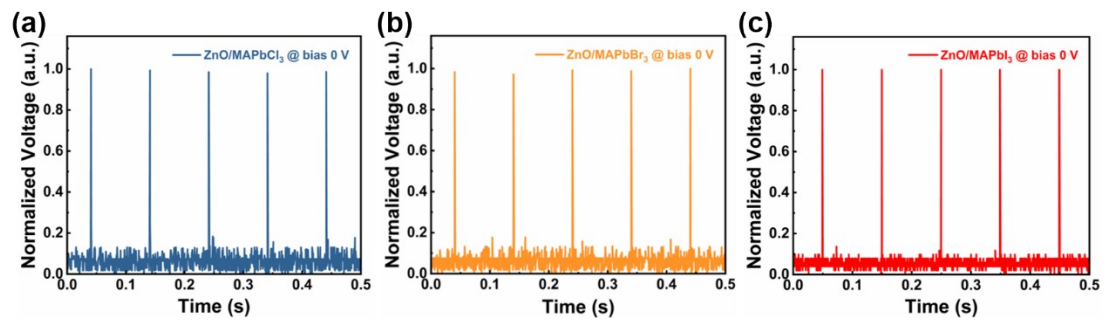

**Fig. S9** (a-c) Transient photoresponse of the ZnO MW/MAPbCl<sub>3</sub>, ZnO MW/MAPbBr<sub>3</sub> and ZnO MW/MAPbI<sub>3</sub> heterojunction photodetector at 0 V.

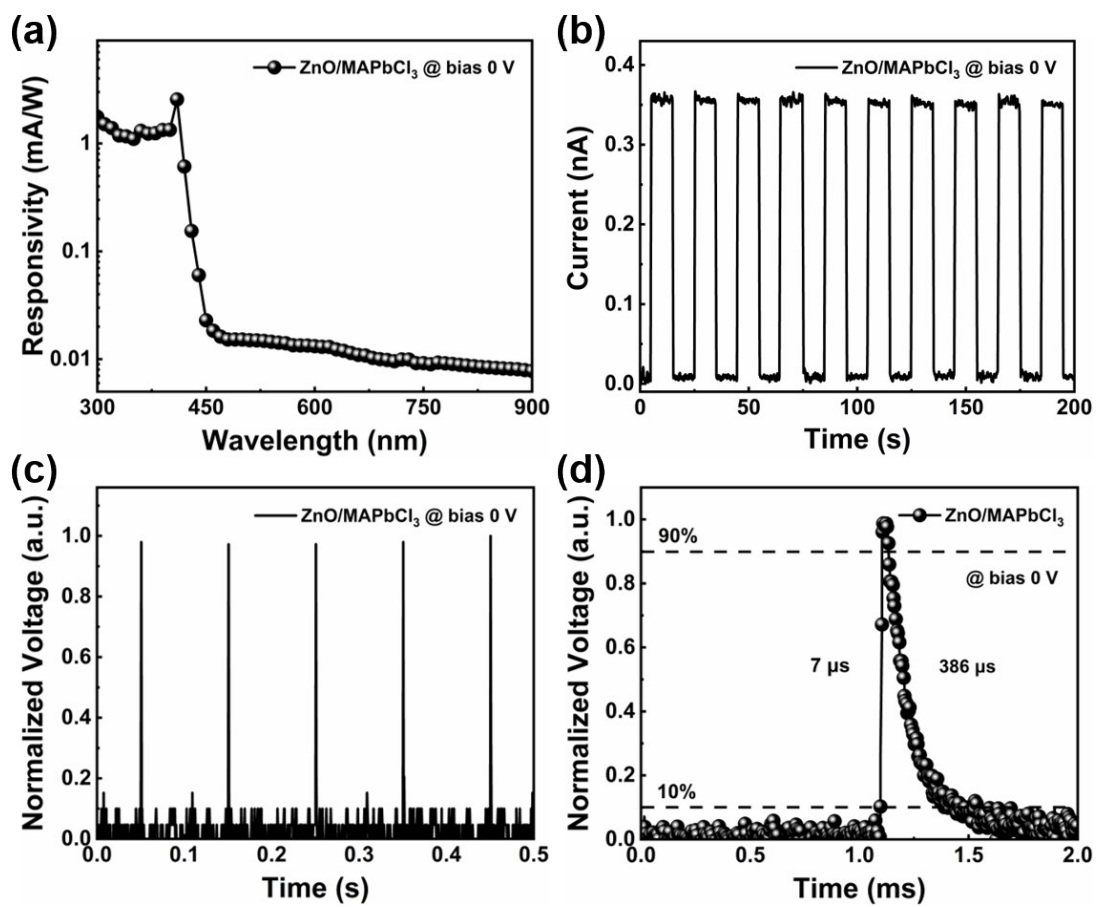

**Fig. S10** (a) The responsivity spectra of the second reassembly ZnO MW/MAPbCl<sub>3</sub> at 0 V. (b) Time-dependent response of ZnO MW/MAPbCl<sub>3</sub> photodetectors at 0 V under illumination (AM 1.5G, 100 mW cm<sup>-2</sup>). (c) Transient photoresponse and (d) a single period transient photoresponse of the ZnO MW/MAPbCl<sub>3</sub> at 0 V under the excitation of 355 nm pulsed laser.

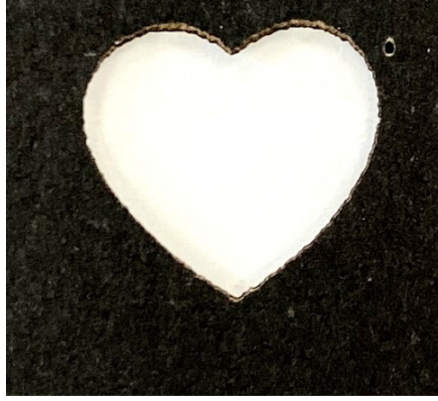

**Fig. S11** The image for the object “heart” on black cardboard.
